# Supplementary material
Source: publisher figshare collection journal article supplement (https://tandf.figshare.com/articles/dataset/_/8082083)
Supplement: Supplementary file 1 [file 1]

Archive with 2 entries (2 files):
- TSSP_A_1609335_FigureS1.pdf
- TSSP_A_1609335_TableS1.pdf
