# Supplementary material
Source: publisher figshare collection journal article supplement (https://tandf.figshare.com/articles/dataset/_/8082083)
Supplement: Supplementary file 1 [file 1 › TSSP_A_1609335_FigureS1.pdf]

[Assumption] The initial value of soil carbon storage at the start of organic matter application was similar between the application and no application plots.

(\*Whether or not the initial values was different from the current value of the no application plot, there was no influence on the estimation.)

### [Example] Continuous application of rice straw compost

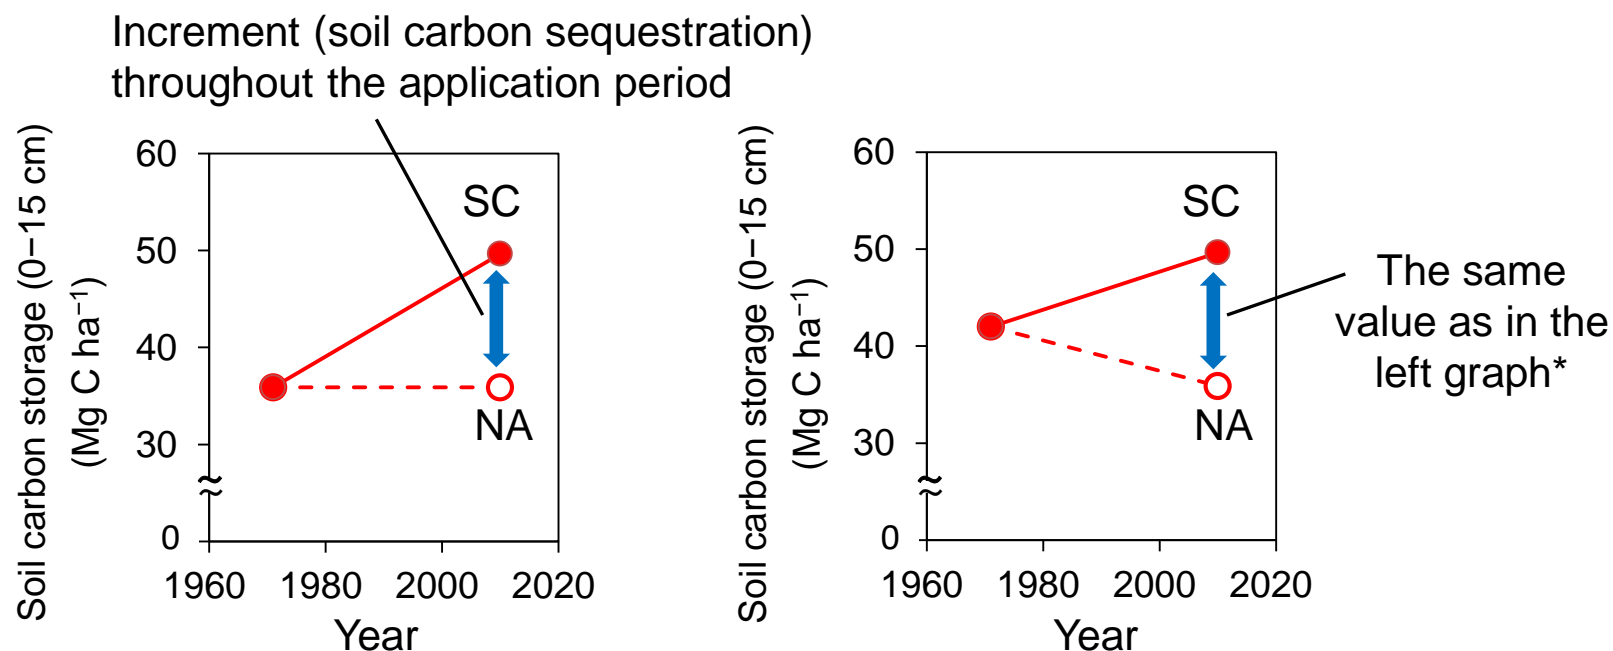

$$\text{Soil carbon sequestration rate (kg C ha}^{-1} \text{ y}^{-1}) = (\text{SC} - \text{NA}) / \text{application year} / 1000$$

**Figure S1** Estimation method soil carbon sequestration rate in continuous application fields by organic matter application throughout the application period.  
NA, no application plot; SC, rice straw compost plot.
