# Supplementary material
Source: publisher figshare collection journal article supplement (https://tandf.figshare.com/articles/dataset/_/8082083)
Supplement: Supplementary file 1 [file 1 › TSSP_A_1609335_TableS1.pdf]

**Table S1** Yield components of rice (three years average)

| Field      | Treatment          | Number of<br>panicles<br>(m <sup>-2</sup> ) | Number of<br>spikelets per<br>panicle | Total number of<br>spikelets<br>(×10 <sup>3</sup> m <sup>-2</sup> ) | Filled spikelets <sup>†</sup><br>(%) | 1000-kernel<br>weight <sup>‡</sup><br>(g) |
|------------|--------------------|---------------------------------------------|---------------------------------------|---------------------------------------------------------------------|--------------------------------------|-------------------------------------------|
| Initial    | No application     | 340                                         | 76.5                                  | 26.0                                                                | 90.8                                 | 22.1                                      |
|            | Rice straw         | 320                                         | 80.0                                  | 25.6                                                                | 89.9                                 | 22.1                                      |
|            | Rice straw compost | 353                                         | 76.2                                  | 26.9                                                                | 90.2                                 | 22.4                                      |
| Continuous | No application     | 345                                         | 74.0                                  | 25.6                                                                | 89.2                                 | 22.0                                      |
|            | Rice straw         | 342                                         | 76.0                                  | 26.0                                                                | 90.2                                 | 21.9                                      |
|            | Rice straw compost | 388                                         | 83.3                                  | 32.3                                                                | 86.9                                 | 21.6                                      |

<sup>†</sup>Estimated by submerging unhulled spikelets in a NaCl solution with a specific gravity (g cm<sup>-3</sup>) of 1.06. <sup>‡</sup>After sieving (1.9 mm) and its moisture contents were adjusted to 15%.
